# Supplementary material for: Speech perception in noise: Impact of directional microphones in users of combined electric-acoustic stimulation
Source: PLoS One. 2019 Mar 6;14(3):e0213251. doi: 10.1371/journal.pone.0213251 (PMC6402691; doi:10.1371/journal.pone.0213251)
Supplement: S1 Table — (XLSX) [file pone.0213251.s001.xlsx]

## Sheet: Tabelle1
											HISQUI Duet 2																				HISQUI SonnetEAS
Subject No.	SRT MSNF DUET 2	SRT MSNF SONNETeas MD/WNR omni/MILD	SRT MSNF SONNETeas MD/WNR nat/MILD	SRT MSNF SONNETeas MD/WNR adapt/MILD	SRT MSNF SONNETeas MD/WNR omni/OFF	SRT MSNF SONNETeas MD/WNR omni/STRONG	FMS DUET 2	FMS SONNETeas WNR OFF	FMS SONNETeas WNR MILD	FMS SONNETeas WNR STRONG	1	2	3	4	5	6	7	8	9	10	11	12	13	14	15	16	17	18	19	Total	1	2	3	4	5	6	7	8	9	10	11	12	13	14	15	16	17	18	19
1	-2.6	-5.2	-8.2	-7.5	-6.4	-5.6	88	93	90	90	6	7	4	4	6	0	6	6	3	6	2	5	6	6	4	5	4	3	4	87	6	7	6	4	6	0	6	6	3	5	3	5	5	4	3	5	4	3	4
2	-4.3	-2.8	-5.5	-5.1	-4	-4.7	90	95	93	93	7	7	5	6	6	4	6	6	6	6	5	4	4	6	5	4	5	5	5	102	7	7	7	6	7	6	6	6	7	7	6	6	7	7	6	6	7	6	6
3	-2.3	-2.5	-2.4	-4.3	-0.5	-1.5	95	85	73	85	6	5	5	4	5	3	4	4	4	6	3	5	6	5	4	4	5	4	5	87	6	5	4	4	6	3	6	4	5	6	5	4	6	6	4	4	4	3	4
4	-2.3	2.8	-0.4	-3.6	-0.4	0.9	60	68	68	78	6	3	6	5	6	6	6	3	6	6	5	3	7	7	5	5	6	6	6	103	6	2	6	4	6	6	6	1	6	5	5	3	5	6	4	5	6	6	5
5	-1.3	-1.7	-3.8	-5.3	-2.4	-0.3	63	88	80	85	4	4	4	4	3	4	4	4	4	5	4	0	3	5	3	4	4	3	4	70	5	4	5	5	6	5	6	5	6	5	5	5	5	6	5	4	6	5	5
6	1.6	-0.7	-2.7	-3	-1.9	-2.9	73	70	78	65	5	3	1	4	2	1	0	2	2	2	2	2	6	3	3	3	4	4	4	53	6	6	3	6	4	2	5	4	4	0	3	4	6	4	4	4	6	5	5
7	-3.6	-2.6	-5.6	-7.4	-1.9	-3.2	83	83	78	88	7	7	6	5	6	5	5	6	4	6	5	5	6	7	5	6	6	5	5	107	6	6	6	5	6	6	5	6	4	6	0	0	5	6	0	6	5	4	5
8	-2.4	-2.8	-4.7	-7.3	-3.5	0	95	88	75	88	7	5	4	4	5	3	4	4	3	5	3	4	6	6	3	6	4	3	3	82	7	5	5	5	3	3	3	4	0	4	3	4	6	6	3	6	3	3	3
9	-1.9	0.2	-3.5	-3	0	-0.8	65	58	53	68	7	6	0	3	3	0	0	4	3	7	3	0	4	4	3	5	4	3	2	61	5	3	0	2	2	0	0	3	2	3	2	3	4	5	3	2	2	2	2
10	1.8	-1.2	-2.6	-6.1	-2.4	-0.8	88	80	70	83	6	5	4	5	6	4	4	4	3	5	3	3	7	6	4	5	5	4	4	87	5	5	4	5	6	4	4	4	3	4	3	4	7	6	7	7	5	5	7
[truncated: 11 more columns]
